# Supplementary material
Source: PubMed Central journal article supplement (PMC3906494)

Figure S1

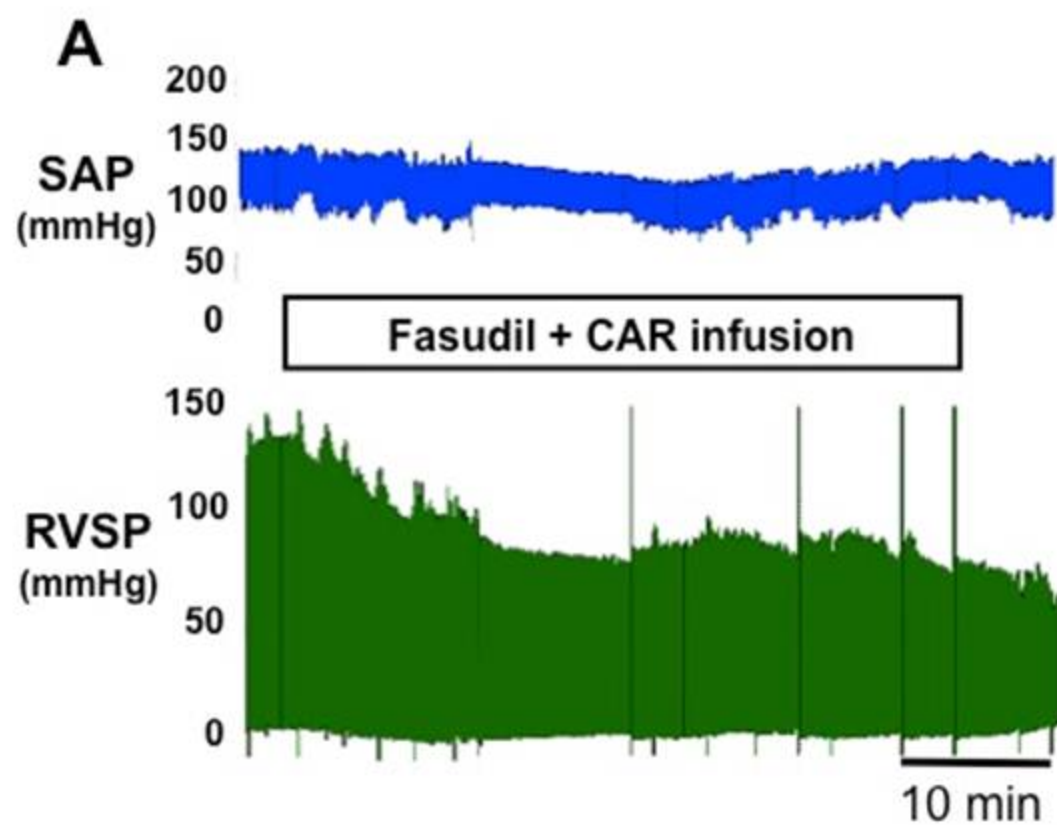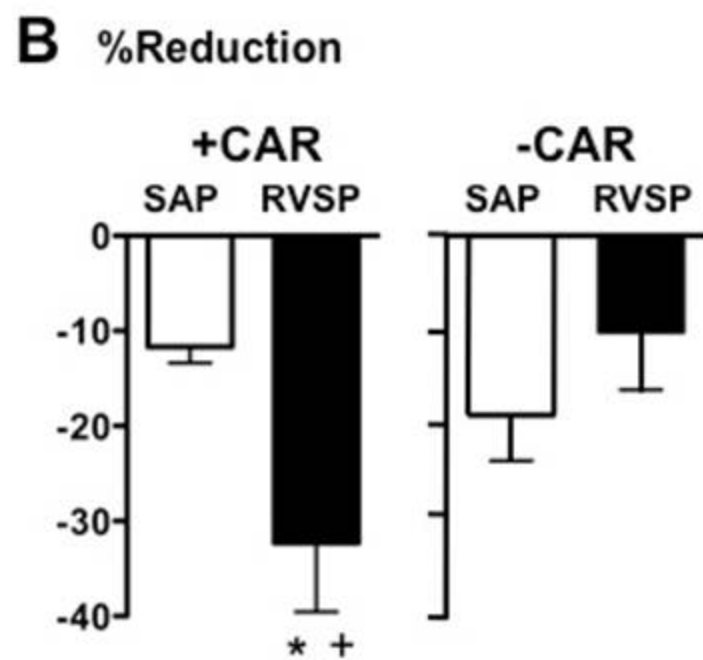

Supplement: mmc1.pdf [file mmc1.pdf]

Figure S2

**A Fasudil Alone Bolus**

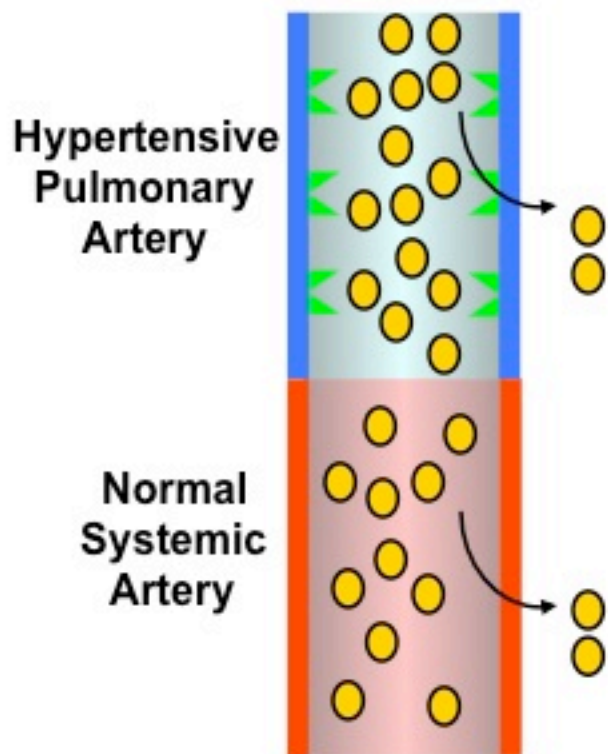

**B Fasudil + CAR Bolus**

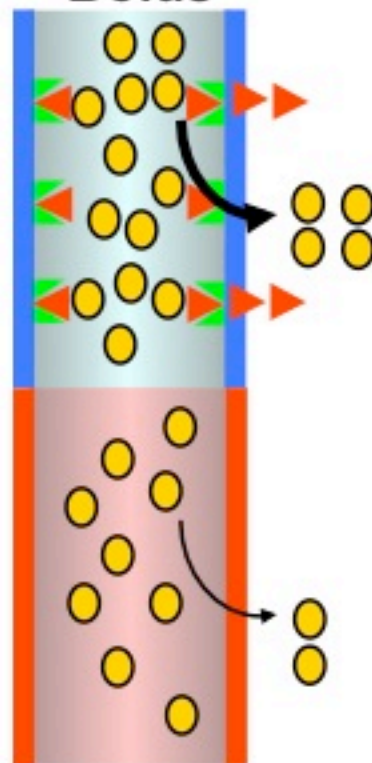

**C Fasudil + CAR Infusion**

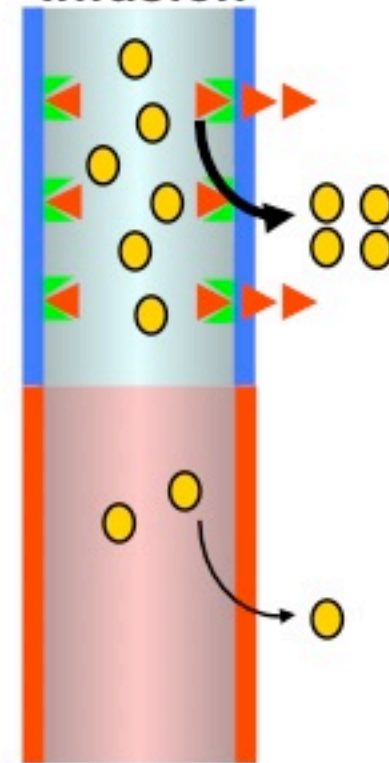

Supplement: mmc2.pdf [file mmc2.pdf]
